# Supplementary material
Source: MDPI journal article supplement (https://www.mdpi.com/2075-4701/10/4/505)

# Experimental Continuous Casting of Nitinol

Gorazd Lojen <sup>1</sup>, Aleš Stambolić <sup>2</sup>, Barbara Šetina Batič <sup>3</sup> and Rebeka Rudolf <sup>4,\*</sup>

<sup>1</sup> Faculty of Mechanical Engineering, University of Maribor, Smetanova ulica 17, 2000 Maribor, Slovenia; gorazd.lojen@um.si

<sup>2</sup> Institute of Metals and Technology, Lepi pot 11, 1000 Ljubljana, Slovenia; ales.stambolic@imt.si

<sup>3</sup> Institute of Metals and Technology, Lepi pot 11, 1000 Ljubljana, Slovenia; barbara.setina@imt.si

<sup>4</sup> Faculty of Mechanical Engineering, University of Maribor, Smetanova ulica 17, 2000 Maribor, Slovenia;

\* Correspondence: rebeka.rudolf@um.si; Tel.: +386-(2)-220-7865

Received: 10 March 2020; Accepted: 10 April 2020; Published: date

## Continuous Casting Device

The laboratory vacuum-induction melting furnace and the vertical continuous casting device are designed for casting directly from the melting crucible. The whole process can be completed in a vacuum or protective atmosphere. The melting furnace can also be used without the continuous caster, as a conventional induction melting furnace. In that case, the bottom with the opening is replaced with one without opening. A schematic drawing of the setup is presented in the Figure S1-1, a photograph in the Figure S1-2.

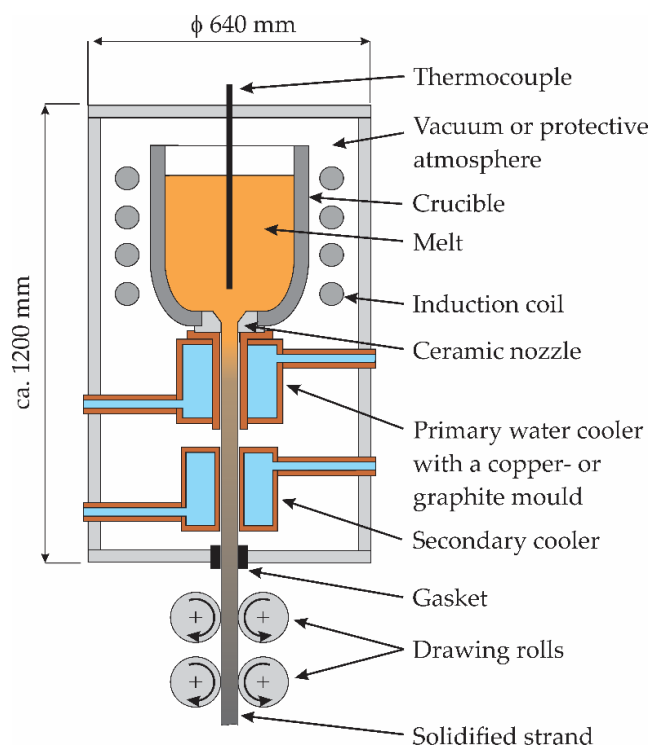

**Figure S1-1.** The vacuum-induction melting furnace with the vertical continuous caster—schematic drawing.

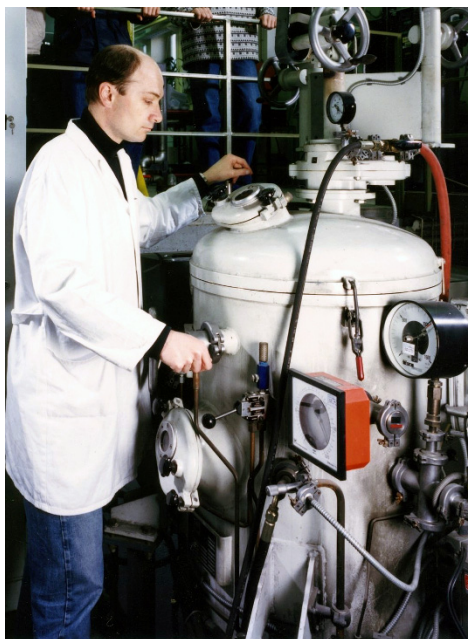

**Figure S1-2.** Vacuum induction-melting furnace; the continuous caster is placed below the furnace but cannot be seen.

### Performances

Vacuum induction melting (VIM) furnace leibold hereaus

Inductor: 4 kHz, max. 60 kW

Maximal charge: 3000 cm<sup>3</sup> (3 litres) of melt

Minimal charge: 1500 cm<sup>3</sup> (1.5 litres) of melt

Melt temperature: max. 2000 °C

Melting and casting under vacuum or protective atmosphere

Vacuum:  $5 \times 10^{-1}$  mbar without continuous caster,  $5 \times 10^{-1}$  mbar with continuous caster

Alloying under a controlled atmosphere possible through the vacuum-antechamber

Sampling of melt under a controlled atmosphere possible through the vacuum antechamber

### Vertical Continuous Casting (VCC) Device Technica Guss

Static mould: graphite or copper, additional ceramic inserts possible

Strand (round):  $d_{\max} = 30$  mm

Strand (flat): up to 10 mm × 100 mm

Withdrawal:

(1) computer-controlled

(2) continuous drawing speed

(3) pulsating drawing speed

(4) pull-stop withdrawal sequence: Drawing stroke, stop1, reverse stroke, stop2. The length and the speed of both strokes and the duration of both stops are programmable; one or both stops and/or reverse stroke can be skipped.

(5)  $v(t)$ -curve programmable.

### Location

Faculty of Mechanical Engineering, University of Maribor, Smetanova ulica 17, 2000 Maribor, Slovenia.

## Experiences

Different alloys were continuous-cast experimentally for scientific research and for customers from Europe (Slovenia, Switzerland, Italy, Great Britain...) and America (USA, Brasil). For example:

- (1) Copper and copper alloys (bronze alloys, brasses, precipitation-hardening alloys),
- (2) Aluminium alloys with quasicrystals,
- (3) Nickel-based superalloys Incoloy® and Inconel®,
- (4) Ni-Fe superalloy Nispan®,
- (5) Magnetic alloy Alnico®,
- (6) Thermo-couple-alloy Constantan®,
- (7) Cu-based shape memory alloys, etc.

## Supplementary Information-S2

## X-ray Diffractograms of Strands 2 and 3

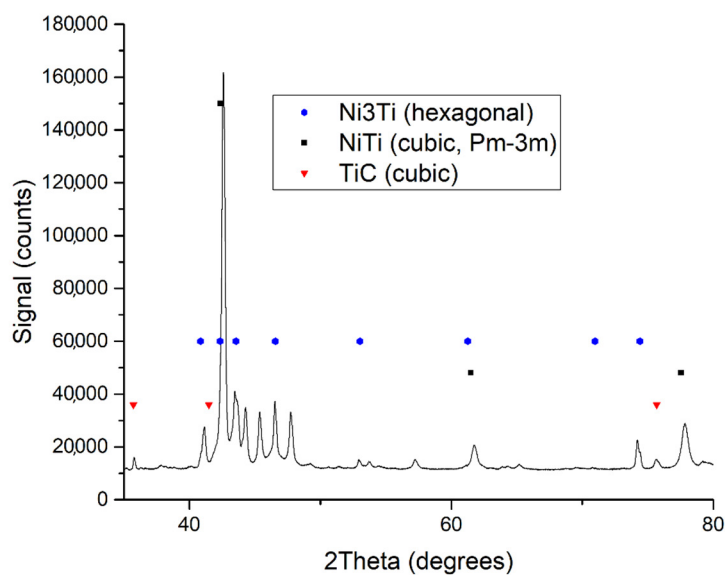

Figure S2-1. X-ray diffractogram of strand 2.

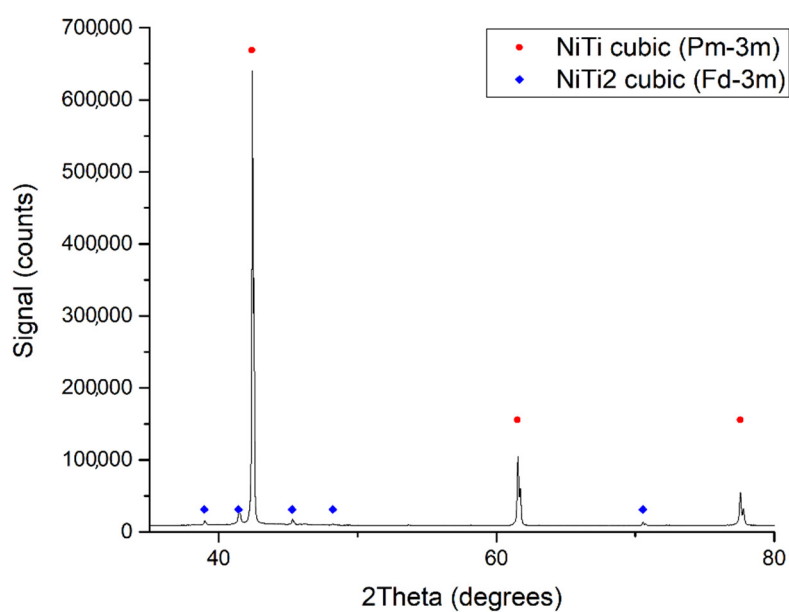

Figure S2-2. X-ray diffractogram of strand 3.

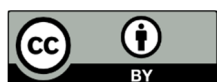

Supplement: s1 [file s1]
